# Supplementary material
Source: HighWire-hosted journal article supplement (https://ijgc.bmj.com/content/33/2/243)

Figure 1 Supplemental: Forest plots from multivariable Cox proportional hazard regression for Progression free Survival

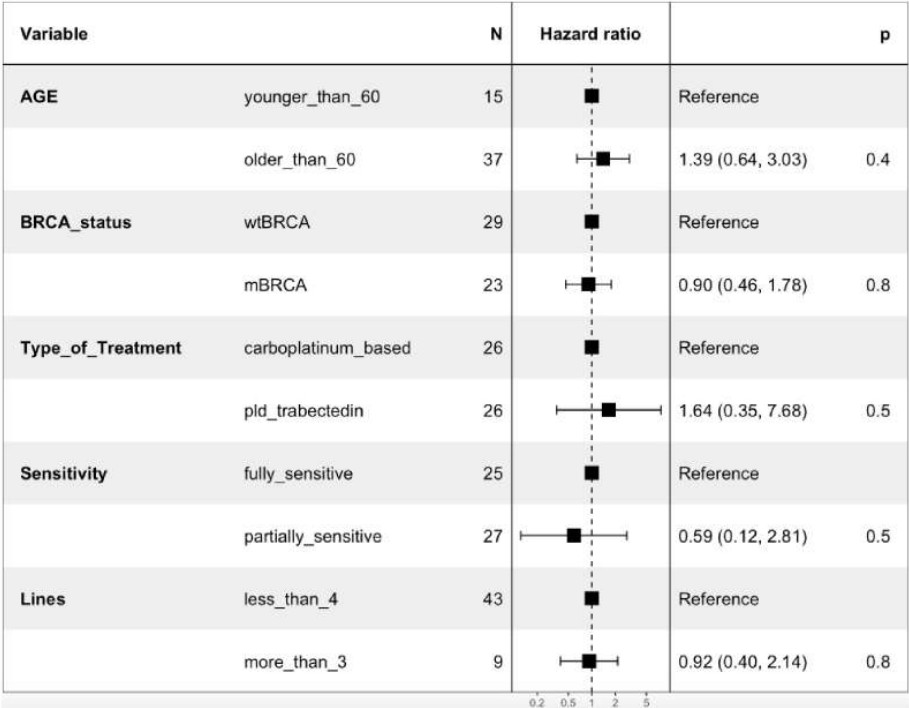

Supplement: inline-supplementary-material-1 [file inline-supplementary-material-1.pdf]
